# Supplementary material
Source: PubMed Central journal article supplement (PMC3234982)
Supplement: supp_M111.304386_jbc.M111.304386-1.pdf [file supp_M111.304386_jbc.M111.304386-1.pdf]

## Supporting Information

**FIGURE S1**

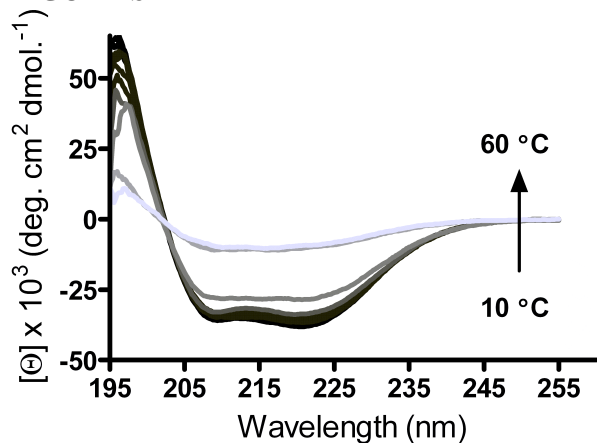

**FIGURE S1.** Far-UV CD of GSTA1-1 W21F:F222W with increasing temperature. The spectra are represented in order of increasing temperature from 10 °C (*black*) to 60 °C (*lightest grey*) in 5 °C increments. Scans were taken of ~10 μM protein in 20 mM potassium phosphate at pH 6.5.

**FIGURE S2**

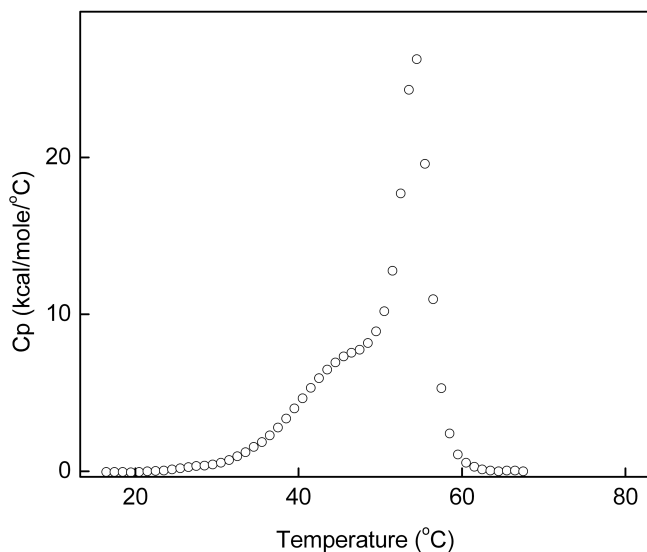

**FIGURE S2.** DSC thermogram of GSTA1-1 W21F:F222W. Data points are represented as *open circles* after protein dimer concentration normalization, buffer scan subtraction, and baseline analysis using the cubic option in Origin 7.0.
